# Supplementary material for: Highly diastereoselective self-assembly of chiral tris(m-ureidobenzyl)amino capsules
Source: Royal Society of Chemistry journal article supplement (doi:10.1039/b809835b), 2008-01-01
Supplement: b809835b.pdf [file b809835b.pdf]

**-Electronic Supporting Information (ESI)-**

*Highly Diastereoselective Self-Assembly of Chiral  
Tris(m-ureidobenzyl)amino Capsules*

*Mateo Alajarín,<sup>\*†</sup> Aurelia Pastor,<sup>\*†</sup> Raúl-Angel Orenes,<sup>†</sup>  
Andres E. Goeta,<sup>‡</sup> Jonathan W. Steed<sup>‡</sup>*

Contribution from the Departamento de Química Orgánica, Facultad de Química, Universidad de Murcia, Campus de Espinardo, Murcia-30100, Spain and the Department of Chemistry, University of Durham, University Science Laboratories, South Road, Durham DH1 3LE, United Kingdom

[alajarin@um.es](mailto:alajarin@um.es); [aureliap@um.es](mailto:aureliap@um.es)

<sup>†</sup> Departamento de Química Orgánica, Universidad de Murcia. Fax: +34 968 364149

<sup>‡</sup> Department of Chemistry, University of Durham. Fax: +44 191 384 4737

**General.** Melting points are not corrected. IR spectra were recorded as nujol emulsions or neat.  $^1\text{H}$ -NMR spectra were recorded at 300 or 400 MHz.  $^{13}\text{C}$ -NMR spectra were measured at 50 or 75 MHz. The chemical shifts are expressed in ppm, relative to TMS  $\delta$  0.00 ppm for  $^1\text{H}$ , while the chemical shifts for  $^{13}\text{C}$  are reported relative to the resonances of  $\text{CDCl}_3$  ( $\delta$  77.1 ppm) or  $\text{DMSO}-d_6$  ( $\delta$  39.5 ppm). Mass spectra were recorded on the EI or ESI mode. The ESI-MS were measured from 1 mM  $\text{CHCl}_3$  solutions (plus 1% of AcOH) of the corresponding triurea.

**Crystallography Report.** The instruments, software and procedures used for data collection, structure solution and refinement were the following: Bruker APEX CCD Diffractometer with Bede Microsource; Data collection and integration: SMART V5.625 (Bruker, 2001) and 'SAINT+ NT V6.22 (Bruker, 2001)' Solution and Refinement 'SHELXS-97' and 'SHELXL-97' (G. M. Sheldrick, University of Goettingen, 1997). Disorder of the butyl chains was modelled in terms of two alternate positions with a common, refined fractional occupancy summed to 1.0. The guest molecules were badly disordered and a model based on the apparent shape of the electron density was adopted. This model lacked H atoms.

### Synthesis of the Tris(*m*-ureidobenzyl)amines 2a-c

The triureas **2a-c** were prepared in a two-step sequence by starting from the triazide **4**<sup>1</sup> (Scheme S1). The yields of every step are included in Table S1.

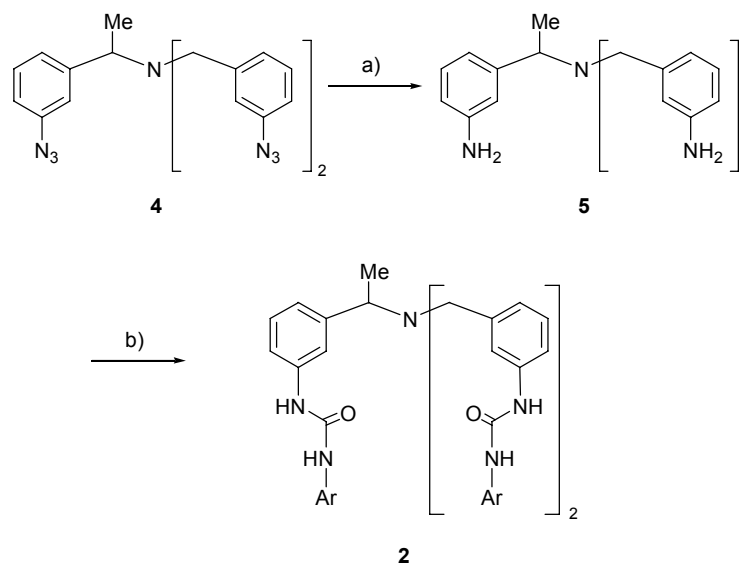

**Scheme S1.** General procedure for the synthesis of the triureas **2**. a)  $\text{LiAlH}_4$  (LAH),  $\text{Et}_2\text{O}$ , 20 °C, 4 h. b)  $\text{ArNCO}$ ,  $\text{CH}_2\text{Cl}_2$ , 20 °C, 18 h.

**Table S1. Synthesis of the triamine 5, and the triureas 2.**

| Entry | Compound  | Ar                                                      | Yield (%) |
|-------|-----------|---------------------------------------------------------|-----------|
| 1     | <b>5</b>  | -                                                       | 44        |
| 2     | <b>2a</b> | <i>p</i> -MeC <sub>6</sub> H <sub>4</sub>               | 96        |
| 3     | <b>2b</b> | <i>p</i> -BuC <sub>6</sub> H <sub>4</sub>               | 68        |
| 4     | <b>2c</b> | <i>p</i> -CF <sub>3</sub> C <sub>6</sub> H <sub>4</sub> | 54        |

**Bis(3-aminobenzyl)[1-(3-aminophenyl)ethyl]amine (5).** A solution of bis(3-azidobenzyl)[1-(3-azidophenyl)ethyl]amine (**4**) (0.45 g, 1.18 mmol) in anhydrous Et<sub>2</sub>O (10 mL) was slowly added to a suspension of LAH (0.13 g, 3.53 mmol) in the same solvent (10 mL) at 20 °C and under a nitrogen-gas atmosphere. Then, the reaction mixture was stirred at the same temperature for 4 h. After cooling down to 0 °C, 10% aqueous NaOH (10 mL) was slowly added and the resulting suspension was filtered through a pad of celite and subsequently washed with Et<sub>2</sub>O (3 × 5 mL). The aqueous phase was extracted with CH<sub>2</sub>Cl<sub>2</sub> (3 × 10 mL) and the combined organic extracts were dried over anhydrous MgSO<sub>4</sub>. After removal of the solvent under reduced pressure the crude product was purified by silica-gel chromatography eluting first with 10:1 AcOEt/hexane and subsequently with AcOEt (*R<sub>f</sub>* = 0.15 in 10:1 AcOEt/hexane) to give **5** as a yellow oil (44%);  $\nu_{\max}(\text{neat})/\text{cm}^{-1}$  3415 (vs), 3341 (vs), 3205 (vs), 1633 (vs), 1602 (vs), 1588 (vs), 1489 (vs), 871 (s), 790 (vs) and 696 (vs);  $\delta_{\text{H}}$  (300 MHz; CDCl<sub>3</sub>; Me<sub>4</sub>Si) 1.37 (3 H, d, *J* = 7.0 Hz), 3.37 (2 H, d, *J* = 14.0 Hz), 3.53 (2 H, d, *J* = 14.0 Hz), 3.44-3.70 (6 H, br s), 3.86 (1 H, q, *J* = 7.0 Hz), 6.51-6.58 (3 H, m), 6.71-6.73 (3 H, m), 6.79 (3 H, d, *J* = 7.5 Hz), 7.07 (2 H, t, *J* = 7.7 Hz) and 7.11 (1 H, t, *J* = 7.7 Hz);  $\delta_{\text{C}}$  (75 MHz; CDCl<sub>3</sub>) 14.6 (q), 53.7 (t), 56.4 (d), 113.5 (d), 115.0 (d), 115.4 (d), 118.7 (d), 119.1 (d), 128.7 (d), 129.0 (d), 141.9 (s), 144.0 (s), 146.0 (s) and 146.3 (s); *m/z* (MS-EI): 347 (M<sup>+</sup> + 1, 2), 346 (M<sup>+</sup>, 2), 331 (17), 240 (65), 226 (32), 211 (24), 121 (38), 120 (42), 107 (39), 106 (100); *m/z* (HRMS-EI): 346.2177 (M<sup>+</sup>, C<sub>22</sub>H<sub>26</sub>N<sub>4</sub> requires 346.2158).

**General procedure for the synthesis of the triureas 2.** The corresponding isocyanate (0.87 mmol) was added to a solution of the triamine **5** (0.10 g, 0.29 mmol) in anhydrous CH<sub>2</sub>Cl<sub>2</sub> (10 mL) and the reaction mixture was stirred at 20 °C under a nitrogen-gas atmosphere for 18 h. After removal of the solvent under reduced pressure, the crude product was washed with Et<sub>2</sub>O (2 mL), filtered and dried under vacuum. The resulting solid was subsequently purified by recrystallization.

**Bis{3-[*N'*-(4-methylphenyl)ureido]benzyl}{ $\alpha$ -methyl-3-[*N'*-(4-methylphenyl)ureido]benzyl}amine (2a).** mp 204-206 °C (from CHCl<sub>3</sub>/Et<sub>2</sub>O); 96%;  $\nu_{\max}$ (nujol)/cm<sup>-1</sup> 3374 (vs), 3298 (vs), 1666 (vs), 1661 (vs), 1604 (vs), 1557 (vs), 1316 (s), 1247 (s), 821 (m), 778 (m), 736 (m) and 700 (s);  $\delta_{\text{H}}$  (300 MHz; DMSO-*d*<sub>6</sub>; Me<sub>4</sub>Si) 1.40 (3 H, d, *J* = 6.8 Hz), 2.21 (9 H, s), 3.35 (2 H, d, *J* = 14.1 Hz), 3.59 (2 H, d, *J* = 14.1 Hz), 3.81 (1 H, q, *J* = 6.8 Hz), 7.04-7.06 (9 H, m), 7.20-7.40 (12 H, m), 7.47 (3 H, s), 8.49 (3 H, s), 8.56 (2 H, s) and 8.59 (1 H, s);  $\delta_{\text{C}}$  (50 MHz; DMSO-*d*<sub>6</sub>) 14.4 (q), 20.3 (q), 53.1 (t), 56.0 (d), 116.6 (d), 117.6 (d), 118.2 (d), 121.4 (d), 121.7 (d), 128.3 (d), 128.6 (d), 129.1 (d), 130.5 (s), 137.1 (s), 139.5 (s), 139.7 (s), 140.6 (s), 142.8 (s), 152.5 (s) and 152.6 (s); found C, 73.72; H, 6.22; N, 13.13. Calc. for C<sub>46</sub>H<sub>47</sub>N<sub>7</sub>O<sub>3</sub>: C, 74.07; H, 6.35; N, 13.14%.

**Bis{3-[*N'*-(4-butylphenyl)ureido]benzyl}{ $\alpha$ -methyl-3-[*N'*-(4-butylphenyl)ureido]benzyl}amine (2b).** mp 159-163 °C (colourless prisms from CHCl<sub>3</sub>/Et<sub>2</sub>O); 68%;  $\nu_{\max}$ (nujol)/cm<sup>-1</sup> 3363 (m), 3307 (m), 1662 (s), 1603 (vs), 1552 (vs), 1513 (m), 1411 (w), 1316 (s), 1303 (m), 1246 (s), 1220 (w), 896 (w), 836 (w) and 698 (w);  $\delta_{\text{H}}$  (300 MHz; DMSO-*d*<sub>6</sub>; Me<sub>4</sub>Si) 0.87 (9 H, t, *J* = 7.2 Hz), 1.27 (6 H, sext, *J* = 7.5 Hz), 1.39 (3 H, d, *J* = 6.9 Hz), 1.49 (6 H, quint, *J* = 7.8 Hz), 2.48 (6 H, t, *J* = 7.2 Hz), 3.35 (2 H, d, *J* = 14.1 Hz), 3.58 (2 H, d, *J* = 14.1 Hz), 3.80 (1 H, q, *J* = 6.9 Hz), 6.99-7.05 (9 H, m), 7.19-7.35 (12 H, m), 7.49 (3 H, s), 8.50 (3 H, s), 8.57 (2 H, s) and 8.59 (1 H, s);  $\delta_{\text{C}}$  (75 MHz; DMSO-*d*<sub>6</sub>) 13.7 (q), 14.4 (q), 21.7 (t), 33.2 (t), 34.1 (t), 53.1 (t), 56.1 (d), 116.6 (d), 117.7 (d), 118.2 (d), 118.3 (d), 121.3 (d), 121.7 (d), 128.4 (d), 128.6 (d), 135.6 (s), 137.3 (s), 139.6 (s), 139.8 (s), 140.6 (s), 142.9 (s), 152.5 (s) and 152.6 (s); found C, 74.97; H, 7.83; N, 11.31. Calc. for C<sub>55</sub>H<sub>65</sub>N<sub>7</sub>O<sub>3</sub>•0.5 H<sub>2</sub>O: C, 74.97; H, 7.55; N, 11.13%.

**Bis{3-[*N'*-(4-trifluoromethylphenyl)ureido]benzyl}{ $\alpha$ -methyl-3-[*N'*-(4-trifluoromethylphenyl)ureido]benzyl}amine (2c).** mp 207-210 °C (colourless prisms); this compound could not be recrystallized due to its high insolubility; 54%;  $\nu_{\max}$ (nujol)/cm<sup>-1</sup> 3325 (m), 1668 (vs), 1605 (vs), 1567 (vs), 1411 (w), 1325 (vs), 1254 (m), 1165 (m), 1120 (s), 1071 (s), 1015 (w), 845 (w), 778 (w), 722 (w) and 698 (w);  $\delta_{\text{H}}$  (300 MHz; DMSO-*d*<sub>6</sub>; Me<sub>4</sub>Si) 1.41 (3 H, d, *J* = 6.8 Hz), 3.37 (2 H, d, *J* = 14.1 Hz), 3.61 (2 H, d, *J* = 14.1 Hz), 3.82 (1 H, q, *J* = 6.8 Hz), 7.07-7.11 (3 H, m), 7.22-7.29 (3 H, m), 7.32-7.39 (3 H, m), 7.54-7.57 (9 H, m), 7.63 (6 H, d, *J* = 8.7 Hz), 8.74 (2 H, s), 8.76 (1 H, s) and 9.05 (3 H, s);  $\delta_{\text{C}}$  (75 MHz; DMSO-*d*<sub>6</sub>) 14.4 (q), 53.1 (t), 56.2 (d), 117.0 (d), 117.7 (d), 118.1 (d), 118.6 (d), 121.7 (q, *J* = 31.5 Hz) (s), 121.8 (d), 122.3 (d), 124.5 (q, *J* = 269.5 Hz) (s), 126.0 (q, *J* = 3.6 Hz) (d), 128.4 (d), 128.7 (d), 139.1 (s), 139.3 (s), 140.7 (s), 143.0 (s), 143.4 (s), 152.3 (s) and 152.3 (s);  $\delta_{\text{F}}$  (188 MHz; DMSO-*d*<sub>6</sub>) -60.4 (s); found C, 60.72; H, 4.10; N, 10.79. Calc. for C<sub>46</sub>H<sub>38</sub>F<sub>9</sub>N<sub>7</sub>O<sub>3</sub>: C, 60.86; H, 4.22; N, 10.80%.

### Synthesis of the Triurea **3**

The triurea **3** was prepared in a two-step sequence by starting from the triazide **6**<sup>2</sup> (Scheme S2).

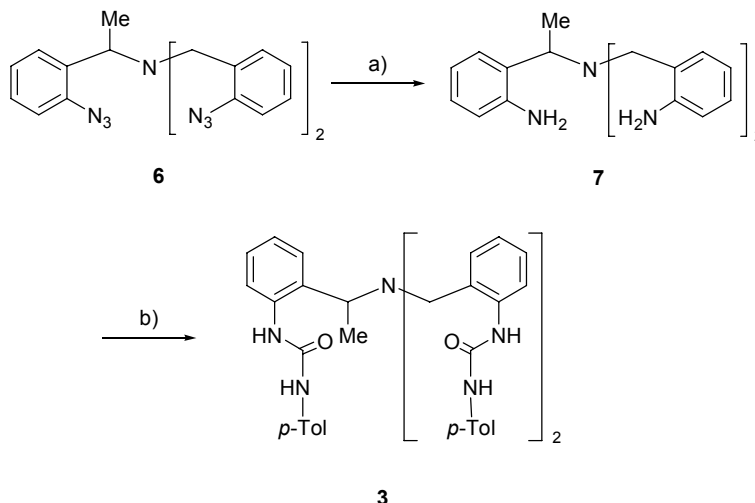

**Scheme S2.** Synthesis of the triurea **3**. a) LAH, Et<sub>2</sub>O, 20 °C, 4 h. b) *p*-MeC<sub>6</sub>H<sub>4</sub>NCO, CH<sub>2</sub>Cl<sub>2</sub>, 20 °C→reflux, 20 h.

**Bis(2-aminobenzyl)[1-(2-aminophenyl)ethyl]amine (7).** A solution of bis(2-azidobenzyl)[1-(2-azidophenyl)ethyl]amine (**6**) (0.22 g, 0.52 mmol) in anhydrous Et<sub>2</sub>O (10 mL) was slowly added to a suspension of LAH (0.06 g, 1.56 mmol) in the same solvent (20 mL) at 20 °C under a nitrogen-gas atmosphere. Then, the reaction mixture was stirred at the same temperature for 4 h more. After cooling at 0 °C, 10% aqueous NaOH (5 mL) was added. The resulting suspension was filtered over a pad of celite and subsequently washed with Et<sub>2</sub>O (3 × 5 mL). The aqueous phase was extracted with CH<sub>2</sub>Cl<sub>2</sub> (3 × 10 mL) and the combined organic extracts were dried with anhydrous MgSO<sub>4</sub>. After removal of the solvent under reduced pressure, the crude product was purified by silica-gel chromatography eluting with 2:1 hexane/AcOEt (*R<sub>f</sub>* = 0.28); mp 177-181 °C (from CH<sub>2</sub>Cl<sub>2</sub>/Et<sub>2</sub>O); 75%;  $\nu_{\max}(\text{nujol})/\text{cm}^{-1}$  3435 (vs), 3348 (vs), 1624 (vs), 1618 (vs), 1612 (vs), 1283 (s), 1112 (s), 1055 (m), 936 (m), 750 (vs) and 732 (s);  $\delta_{\text{H}}$  (300 MHz; CDCl<sub>3</sub>; Me<sub>4</sub>Si) 1.49 (3 H, d, *J* = 6.8 Hz), 3.31 (2 H, d, *J* = 13.1 Hz), 3.65 (6 H, br s), 3.84 (2 H, d, *J* = 13.1 Hz), 4.14 (1 H, q, *J* = 6.8 Hz), 6.51-6.56 (3 H, m), 6.68 (2 H, td, *J* = 7.4 and 1.3 Hz), 6.74 (1 H, td, *J* = 7.5 and 1.1 Hz), 7.03-7.10 (5 H, m) and 7.27 (1 H, dd, *J* = 7.8 and 1.2 Hz);  $\delta_{\text{C}}$  (75 MHz; CDCl<sub>3</sub>) 7.0 (q), 51.0 (t), 51.2 (d), 115.6 (d), 116.0 (d), 117.8 (d), 117.9 (d), 122.0 (s), 126.0 (s), 128.0 (d), 128.4 (d), 129.0 (d), 132.0 (d), 145.5 (s) and 145.8 (s); *m/z* (MS-EI): 347 (M<sup>+</sup> + 1,

97), 334 (19), 333 (44), 226 (100), 209 (98), 119 (99) and 77 (99); found C, 75.30; H, 7.56; N, 16.03. Calc. for  $C_{22}H_{26}N_4 \cdot 0.25 H_2O$ : C, 75.29; H, 7.61; N, 15.96%.

**Bis{2-[N'-(4-methylphenyl)ureido]benzyl}{ $\alpha$ -methyl-2-[N'-(4-methylphenyl)ureido]benzyl}amine (3).** *p*-Methylphenyl isocyanate (0.12 g, 0.87 mmol) was added to a solution of the triamine **7** (0.10 g, 0.29 mmol) in anhydrous  $CH_2Cl_2$  (5 mL). The reaction mixture was stirred at 20 °C under a nitrogen-gas atmosphere for 18 h and subsequently under reflux for 2 h more. After removal of the solvent under reduced pressure, the crude product was washed with  $Et_2O$  (2 mL), filtered and dried under vacuum. The resulting solid was subsequently purified by recrystallization; mp 164-168 °C (colourless prisms from  $CHCl_3/Et_2O$ ); 72%;  $\nu_{max}(nujol)/cm^{-1}$  3316 (s), 1651 (vs), 1602 (vs), 1548 (vs), 1512 (vs), 1314 (s), 1292 (s), 1237 (vs), 814 (m) and 754 (m);  $\delta_H$  (300 MHz;  $DMSO-d_6$ ;  $Me_4Si$ ) 1.45 (3 H, d,  $J = 6.8$  Hz), 2.24 (9 H, s), 3.61 (2 H, d,  $J = 15.0$  Hz), 3.64 (2 H, d,  $J = 15.0$  Hz), 4.26 (1 H, q,  $J = 6.8$  Hz), 6.89 (2 H, t,  $J = 7.5$  Hz), 6.99-7.16 (10 H, m), 7.29-7.43 (10 H, m), 7.57-7.60 (2 H, m), 7.70 (1 H, s), 7.80 (2 H, s), 8.52 (1 H, s) and 8.64 (2 H, s);  $\delta_C$  (75 MHz;  $DMSO-d_6$ ) 13.4 (q), 20.3 (q), 50.6 (t), 53.5 (d), 118.26 (d), 118.32 (d), 123.6 (d), 124.1 (d), 124.3 (d), 125.9 (d), 126.8 (d), 127.1 (d), 127.7 (d), 129.0 (d), 129.5 (d), 130.37 (s), 130.44 (s), 130.9 (s), 135.4 (s), 136.5 (s), 136.8 (s), 137.10 (s), 137.14 (s), 153.2 (s) and 153.8 (s); found C, 73.73; H, 6.46; N, 13.27. Calc. for  $C_{46}H_{47}N_7O_3$ : C, 74.07; H, 6.35; N, 13.14%.

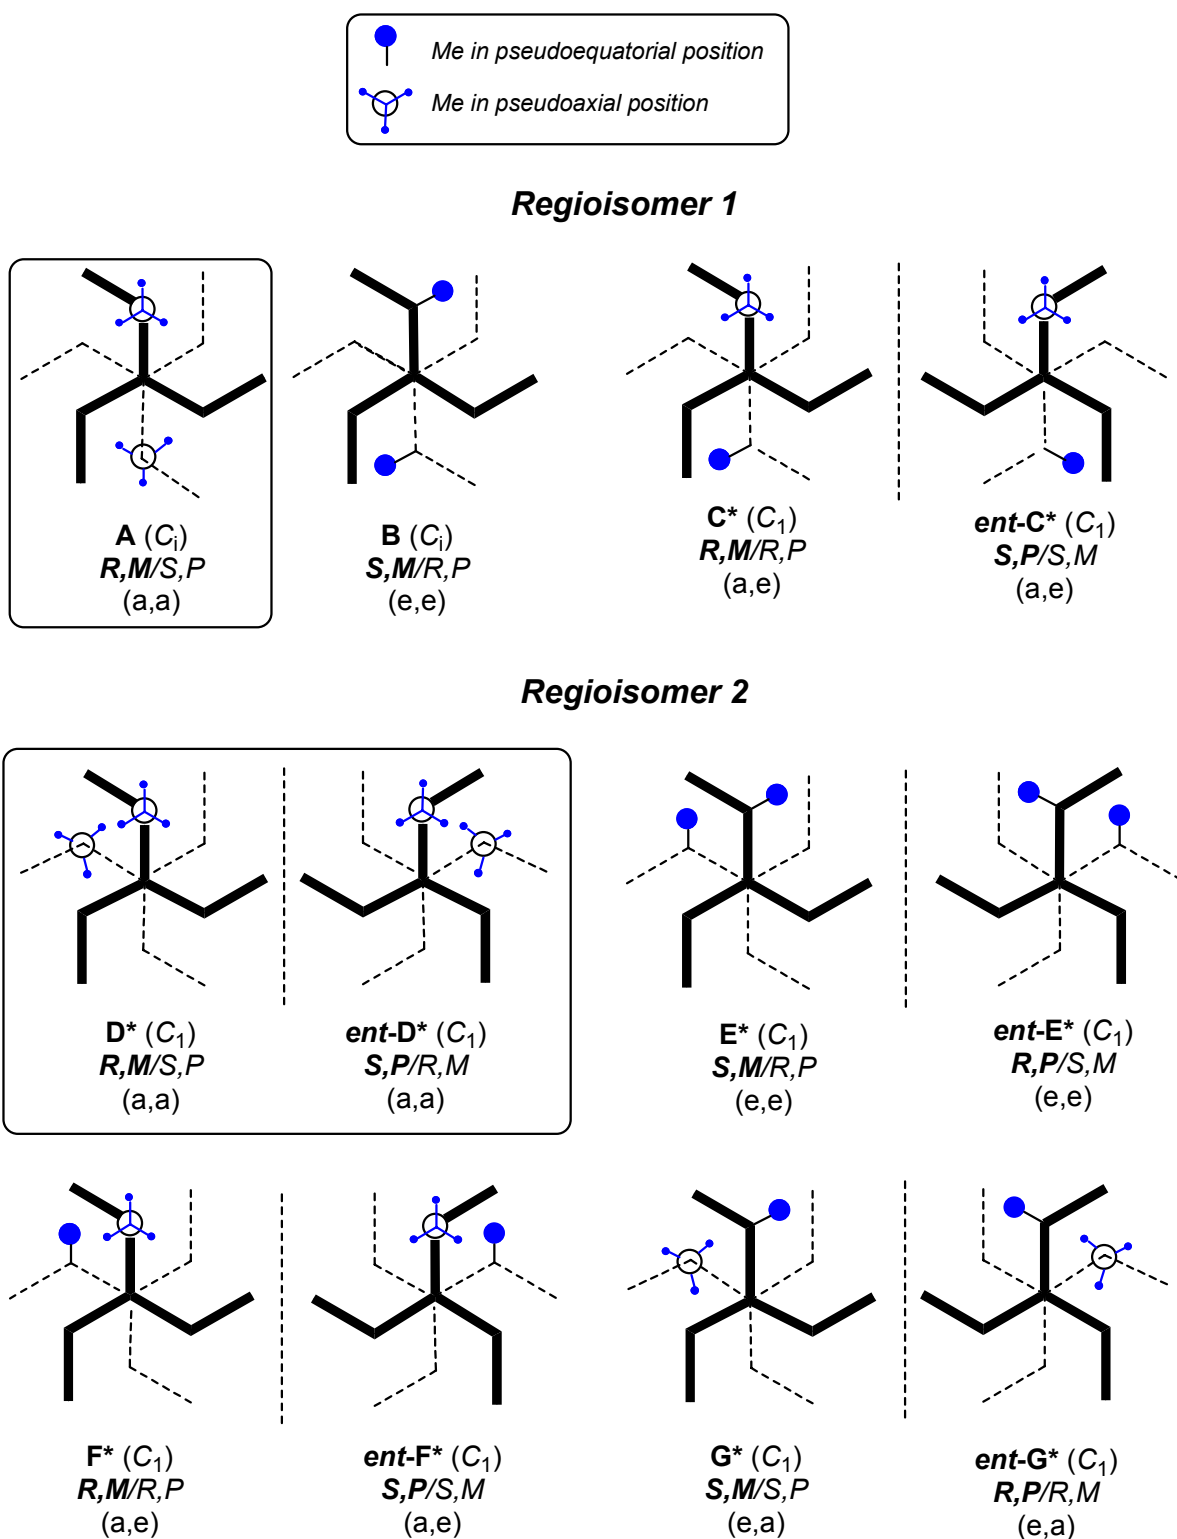

**Figure S1.** Symmetry properties of the chiral tris(*m*-ureidobenzyl)amines **2**. Regioisomer 1 may exist as three diastereoisomers, two of them are centrosymmetric (**A** and **B**) and one is chiral (the pair of enantiomers **C\*** and **ent-C\***). Regioisomer 2 may

exist as four chiral diastereoisomers (the four pairs of enantiomers: **D\***/*ent*-**D\***, **E\***/*ent*-**E\***, **F\***/*ent*-**F\*** and **G\***/*ent*-**G\***).

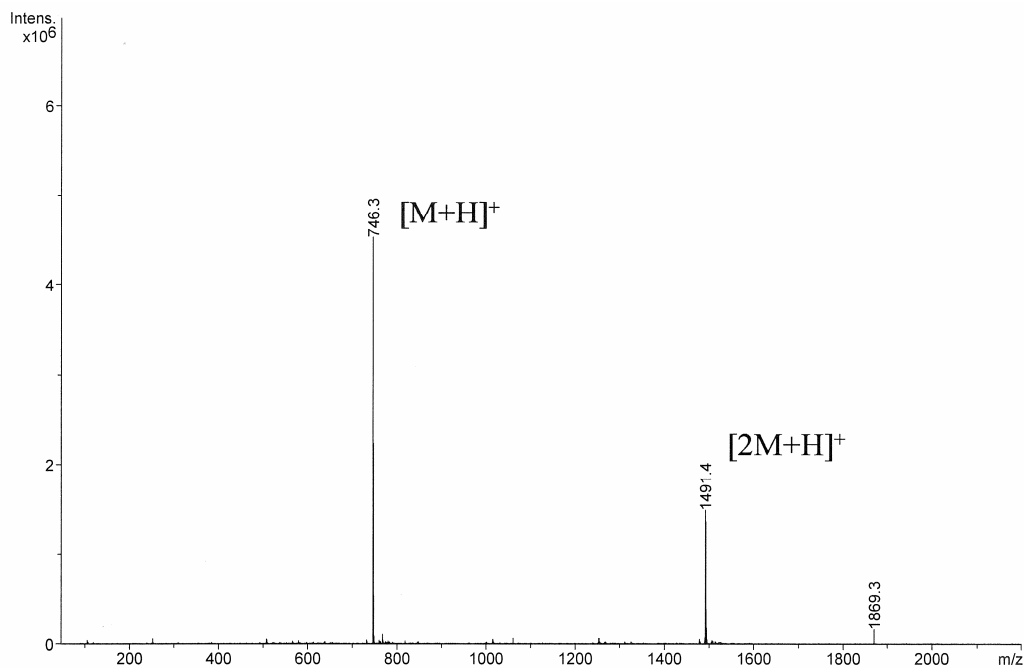

**Figure S2.** ESI-MS (CHCl<sub>3</sub>; 1% AcOH) of the triurea **2a**.

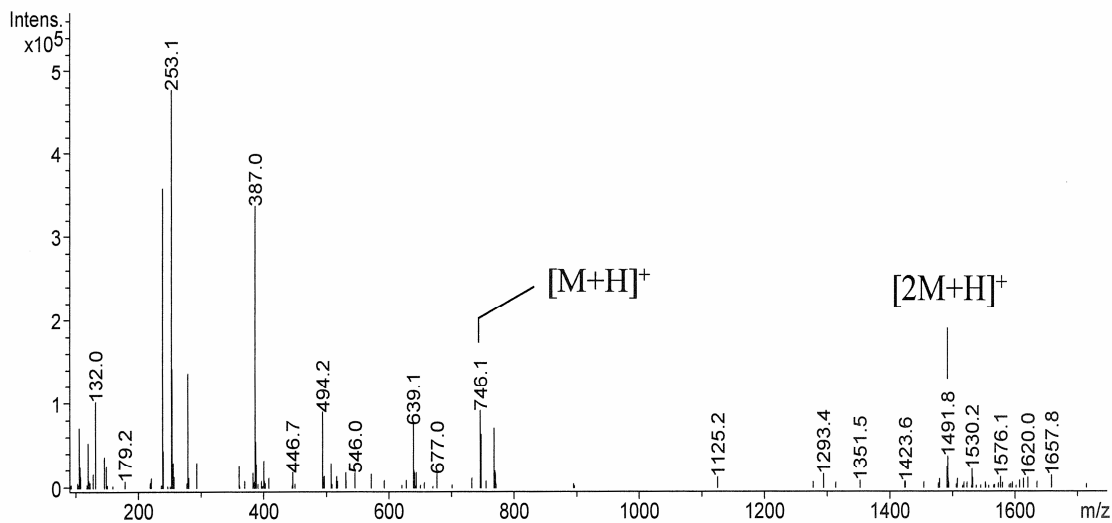

**Figure S3.** ESI-MS (CHCl<sub>3</sub>; 1% AcOH) of the triurea **3**.



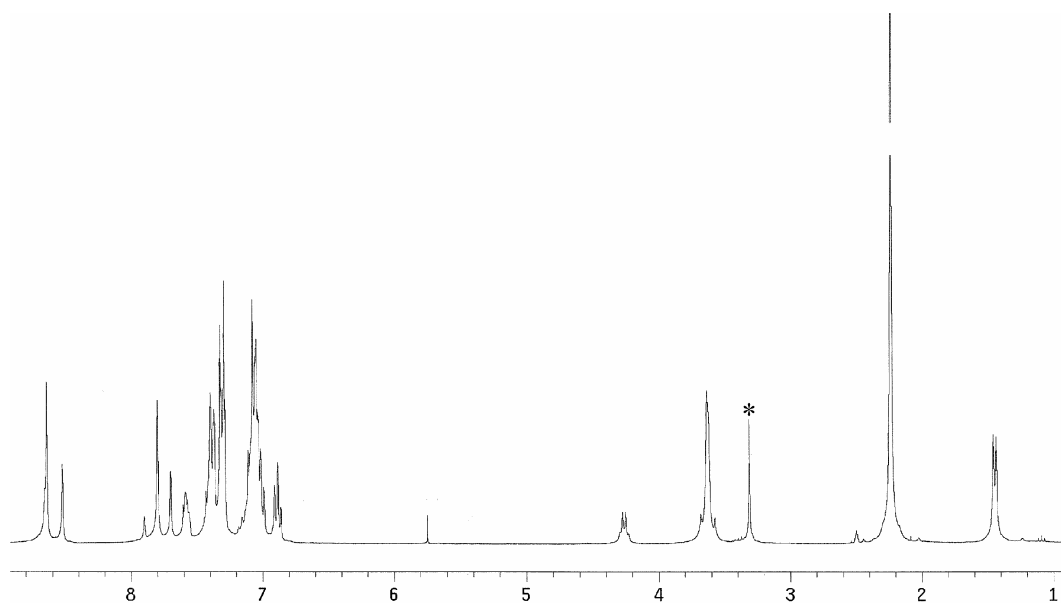

**Figure S4.**  $^1\text{H}$  NMR spectrum (300 MHz, 25 °C) of the triurea **3** in  $\text{DMSO-}d_6$ . The signal from water has been labelled with an asterisk.

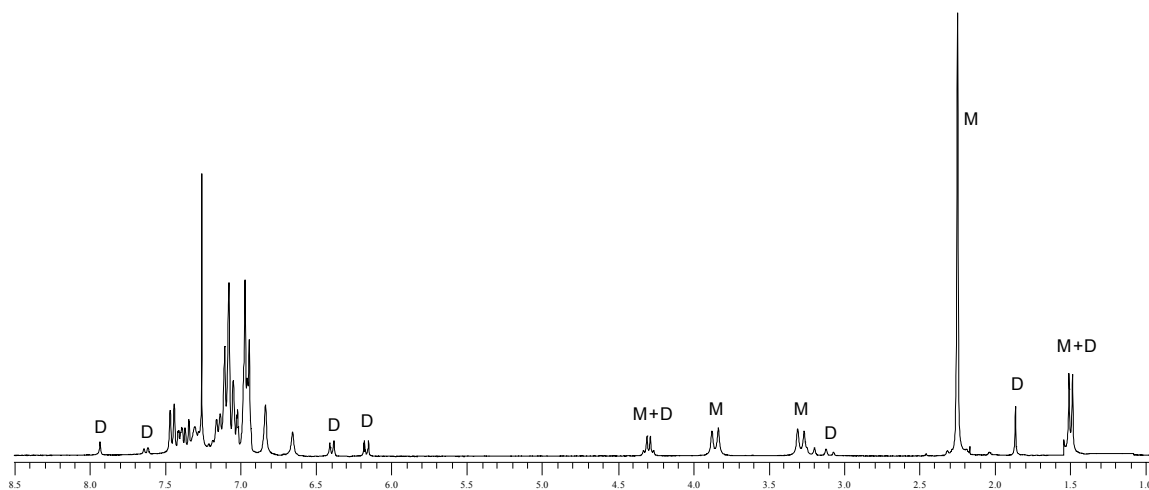

**Figure S5.**  $^1\text{H}$  NMR spectrum (300 MHz, 25 °C) of the triurea **3** in  $\text{CDCl}_3$  (the signals attributed to the monomer and dimer species have been labelled with **M** and **D**, respectively).

1. Alajarin, M.; López-Leonardo, C.; Vidal, A.; Berná, J.; Steed, J. W. *Angew. Chem. Int. Ed.* **2002**, *41*, 1205-1208.
2. Alajarin, M.; López-Lázaro, A.; Vidal, A.; Berná, J. *Chem. Eur. J.* **1998**, *4*, 2558-2570.
